## **Similarity judgments and cortical visual responses reflect different properties of object and scene categories in naturalistic images**

Abbreviated title (50 character max): Object and scene categories in brain and behavior

Marcie L. King<sup>1,2\*</sup>, Iris I. A. Groen<sup>1,3\*</sup>, Adam Steel<sup>1</sup>, Dwight J. Kravitz<sup>4</sup>, Chris I. Baker<sup>1</sup>

1 – Laboratory of Brain and Cognition, National Institute of Mental Health, National Institutes of Health, Bethesda, MD 20892

2 – Department of Psychological and Brain Sciences, University of Iowa, W311 Seashore Hall, Iowa City, IA 52242

3 – Department of Psychology, New York University, 6 Washington Place, New York, NY 10003

4 – Department of Psychology, George Washington University, 2125 G St. NW, Washington DC, 20008

\* co-first authors

Corresponding author: CIB ([bakerchris@mail.nih.gov](mailto:bakerchris@mail.nih.gov))

Number of pages: 37

Number of figures: 10

Number of words:

Abstract – 236

Significance statement - 111

Introduction – 650

Discussion – 1491

Conflict of Interests: None

### **Acknowledgements**

We thank Susan Wardle and Martin Hebart for helpful discussion and comments on earlier versions of this manuscript, Ed Silson for help with the ROI definitions, and Steven Scholte for help implementing the DNN analyses. This research was supported by the Intramural Research Program of the US National Institute of Mental Health (ZIAMH 002909), Clinical Study Protocol 93-M-0170, NCT00001360. The authors declare no competing financial interests.

### **Author Contributions**

MLK, DJK and CIB designed the study. MLK and IAG performed the research. MLK, IAG, AS and DJK analyzed the data. MLK, DJK, IAG, AS and CIB wrote the paper.

1 **Abstract**

2

3 Numerous factors have been reported to underlie the representation of complex images in high-  
4 level human visual cortex, including categories (e.g. faces, objects, scenes), animacy, and real-  
5 world size, but the extent to which this organization is reflected in behavioral judgments of real-  
6 world stimuli is unclear. Here, we compared representations derived from explicit similarity  
7 judgments and ultra-high field (7T) fMRI of human visual cortex for multiple exemplars of a diverse  
8 set of naturalistic images from 48 object and scene categories. Behavioral judgements revealed a  
9 coarse division between man-made (including humans) and natural (including animals) images,  
10 with clear groupings of conceptually-related categories (e.g. transportation, animals), while these  
11 conceptual groupings were largely absent in the fMRI representations. Instead, fMRI responses  
12 tended to reflect a separation of both human and non-human faces/bodies from all other categories.  
13 This pattern yielded a statistically significant, but surprisingly limited correlation between the two  
14 representational spaces. Further, comparison of the behavioral and fMRI representational spaces  
15 with those derived from the layers of a deep neural network (DNN) showed a strong  
16 correspondence with behavior in the top-most layer and with fMRI in the mid-level layers. These  
17 results suggest that there is no simple mapping between responses in high-level visual cortex and  
18 behavior – each domain reflects different visual properties of the images and responses in high-  
19 level visual cortex may correspond to intermediate stages of processing between basic visual  
20 features and the conceptual categories that dominate the behavioral response.

21 **Significance Statement**

22

23 It is commonly assumed there is a correspondence between behavioral judgments of complex  
24 visual stimuli and the response of high-level visual cortex. We directly compared these  
25 representations across a diverse set of naturalistic object and scene categories and found a  
26 surprisingly and strikingly different representational structure. Further, both types of representation  
27 showed good correspondence with a deep neural network, but each correlated most strongly with  
28 different layers. These results show that behavioral judgments reflect more conceptual properties  
29 and visual cortical fMRI responses capture more general visual features. Collectively, our findings  
30 highlight that great care must be taken in mapping the response of visual cortex onto behavior,  
31 which clearly reflect different information.

32 **Introduction**

33

34 The ventral visual pathway, extending from primary visual cortex (V1) through the inferior temporal  
35 lobe, is thought to be critical for object, face and scene recognition (Kravitz et al., 2013). While  
36 posterior regions in this pathway respond strongly to the presentation of low-level visual features,  
37 more anterior regions are thought to encode high-level categorical aspects of the visual input. For  
38 example, functional magnetic resonance imaging (fMRI) studies have identified category-selective  
39 regions in ventral temporal cortex (vTC) and lateral occipitotemporal cortex (IOTC) that show  
40 preferential responses for images of one category compared to another (e.g. face-selective fusiform  
41 face area or FFA, scene-selective parahippocampal place area or PPA, and object-selective lateral  
42 occipital complex or LOC; Kanwisher and Dilks, 2013). However, many other factors have been  
43 reported to contribute to responses in high-level visual cortex, including, but not limited to,  
44 eccentricity (Hasson et al., 2003), elevation (Silson et al., 2015), real-world size (Konkle and Oliva,  
45 2012), typicality (Iordan et al., 2016), category level (i.e. superordinate, basic, subordinate – Iordan  
46 et al., 2015), and animacy (Kriegeskorte et al., 2008; Connolly et al., 2012; Naselaris et al., 2012;  
47 Sha et al., 2015; Proklova et al., 2016). The goal of the current study was determine the  
48 correspondence between the response of high-level visual cortex and our mental representations  
49 of category by comparing the representational space reflected in fMRI responses with behavioral  
50 similarity judgements for naturalistic images across a broad range of object and scene categories.

51

52 Determining how responses in high-level visual cortex relate to behavior is critical for elucidating  
53 the functional significance of these regions. For tasks such as identification and categorization,  
54 relevant information has been reported in the responses of IOTC and vTC (Kravitz et al., 2013;  
55 Grill-Spector and Weiner, 2014) and it is commonly assumed there is a direct mapping between  
56 responses in high-level visual cortex and behavioral judgments. But this assumption belies the  
57 diverse behavioral goals these regions likely support (Malcolm et al., 2016; Peelen and Downing,  
58 2017). While the fMRI responses in both human and non-human primate vTC appear to reflect  
59 major distinctions between animate/inanimate and face/body, behavioral similarity judgements



60 reveal additional fine-grained representational structure, particularly for inanimate objects  
61 (Kriegeskorte et al., 2008; Mur et al., 2013). However, these studies contained a limited sampling  
62 of different categories that emphasized some categories (e.g. faces, food/fruit) over others (e.g.  
63 chairs, appliances) and may have only captured part of the representational structure. While other  
64 fMRI studies have included a broader sampling of different categories (Huth et al., 2012; Naselaris  
65 et al., 2012), behavioral judgments were not collected beyond labels for discrete elements of the  
66 images that may not characterize the broader conceptual representation. Here, we combined a  
67 varied sampling of different categories with both ultra-high field (7T) fMRI and detailed behavioral  
68 similarity measurements to determine what aspects of representation are shared between behavior  
69 and the response of high-level visual cortex.

70

71 We presented multiple images from 48 categories ranging across both object (e.g. bags, dolls) and  
72 scene (e.g. kitchens, mountains) categories. In contrast to some prior studies that presented  
73 segmented objects with limited, arbitrary or no context (Kriegeskorte et al., 2008; Konkle and Oliva,  
74 2012; Yamins et al., 2014) our study used objects in typical contexts. We found highly reproducible  
75 but distinct structure in both behavior and fMRI with little evidence for the previously reported  
76 animacy division. Instead, behavioral judgments reflected a manmade/natural division, while  
77 cortical regions largely showed a separation of images containing human and non-human faces  
78 and bodies from everything else. Computational features extracted from a deep neural network  
79 (DNN) trained on object recognition correlated with representational structure in both behavior and  
80 fMRI, but the strongest match with behavior was with the highest DNN layer, while fMRI correlated  
81 best with a mid-level DNN layer. Collectively, these results suggest that while both behavior and  
82 the response of high-level visual cortex reflect combinations of visual features, those features differ  
83 between domains, with no direct mapping between them.

84

## 85 **Materials and Methods**

86

87 *Stimuli.* We retrieved high-resolution (1024x768 pixels) color photographs from Google Images to  
88 construct two sets of stimuli, each comprised of 144 individual color images of complex scenes.  
89 We included two separate sets to be able to test generalization of our findings across images. Each  
90 set of images (hereby referred to as Image Set 1 and Image Set 2) contained 48 concrete  
91 categories, with 3 exemplar images per category (Figure 1). The 48 categories were chosen to  
92 reflect a diverse range of naturalistic object and scene categories. All of the images in Image Set  
93 1 and Image Set 2 depicted people, places, and things in natural context and from familiar  
94 viewpoints. The images portrayed scenes that one might expect to see on a typical day, and were  
95 chosen for their neutral nature (i.e. to be unlikely to elicit any strong emotional response).

96

97 *Participants and testing.* 20 healthy human volunteers (9 male, mean age = 27.7 years) participated  
98 in the behavioral similarity judgment experiment. 10 participants viewed Image Set 1 (4 male, mean  
99 age = 29.3) and 10 participants viewed Image Set 2 (5 male, mean age = 26.1). 10 of these  
100 participants also participated in the corresponding fMRI experiment prior to participating in the  
101 behavioral portion of this study. 5 of these participants viewed stimuli from Image Set 1 (3 male,  
102 mean age = 26.6 years) and 5 participants viewed stimuli from Image Set 2 (2 male, mean age =  
103 26.2 years). Each participant saw the same stimulus set in both the behavioral and fMRI  
104 experiment. All fMRI participants completed the fMRI scan session before rating the behavioral  
105 similarities of the images. This study was conducted in accordance with The National Institutes of  
106 Health Institutional Review Board, and all participants gave written informed consent as part of the  
107 study protocol (93 M-0170, NCT00001360) prior to participation in the study.

108

109 *Behavioral paradigm.* We adopted a multi-arrangement paradigm previously used by Kriegeskorte,  
110 Mur and colleagues (Kriegeskorte and Mur, 2012; Mur et al., 2013). Participants were seated at a  
111 distance of approximately 50 cm in front of a computer monitor (Dell U3014, 30 inches, 2560 x  
112 1600 pixels) and completed the object arrangement task on 144 images comprising either Image  
113 Set 1 or Image Set 2. At the onset of the task, all 144 images were presented simultaneously in  
114 random order around the perimeter of a circle presented on the computer monitor, forming an

115 “arena” in which similarity judgments were made. Participants were instructed to “please arrange  
116 these images according to their similarity, whatever that means to you. Images that are more similar  
117 should go closer together and images that are less similar should go farther apart.” These  
118 instructions were purposefully general so as not to bias the arrangements of the images in any  
119 particular way, allowing us to investigate what dimensions participants spontaneously use when  
120 judging the similarity between images. Participants dragged the individual images into the arena  
121 using the mouse and physically arranged them according to their perceived similarity. Given the  
122 large number of images (and thus the small size each could be presented at), when a participant  
123 clicked on a particular image in the arena, an enlarged version of the image (150 x 200 pixels) was  
124 displayed in the top right of the computer screen.

125         Given the large number of images in the stimulus sets, participants completed only one  
126 arrangement of the images, in contrast to the original implementation of this method that used  
127 additional trials with selective subsets of stimuli (Kriegeskorte et al., 2012). However, participants  
128 were able to re-arrange images within the circular area on the screen after their initial placement  
129 as many times as they wanted within a 1-hour time limit, and they were encouraged to verify that  
130 they were satisfied with the final arrangement. In addition, in our experience this task exhibits very  
131 high correlations between results of the first and the last trial (unpublished data). One of the benefits  
132 of this arrangement method is that we were able to collect a large number of simultaneous pairwise  
133 similarity judgments in a reasonably short amount of time. Perceived object-similarity is traditionally  
134 measured using pairwise similarity judgments, however it would take many hours and testing  
135 sessions to acquire judgments on our 10,296 possible pair combinations of images. Therefore, in  
136 the current method we used the spatial arrangement of the images as a measure of their perceived  
137 similarity. Specifically, the Euclidean distance between an image and every other image was used  
138 as the measurement of perceived dissimilarity between the images (i.e. dissimilarity estimate).  
139 Representational dissimilarity matrices (RDMs) were constructed for each participant, using the  
140 ranked dissimilarity estimates for each image pair. Note that the distance matrix discards the  
141 absolute position of stimuli and only retains their relative location, which should minimize bias  
142 related to the initial placement of the stimuli.

143

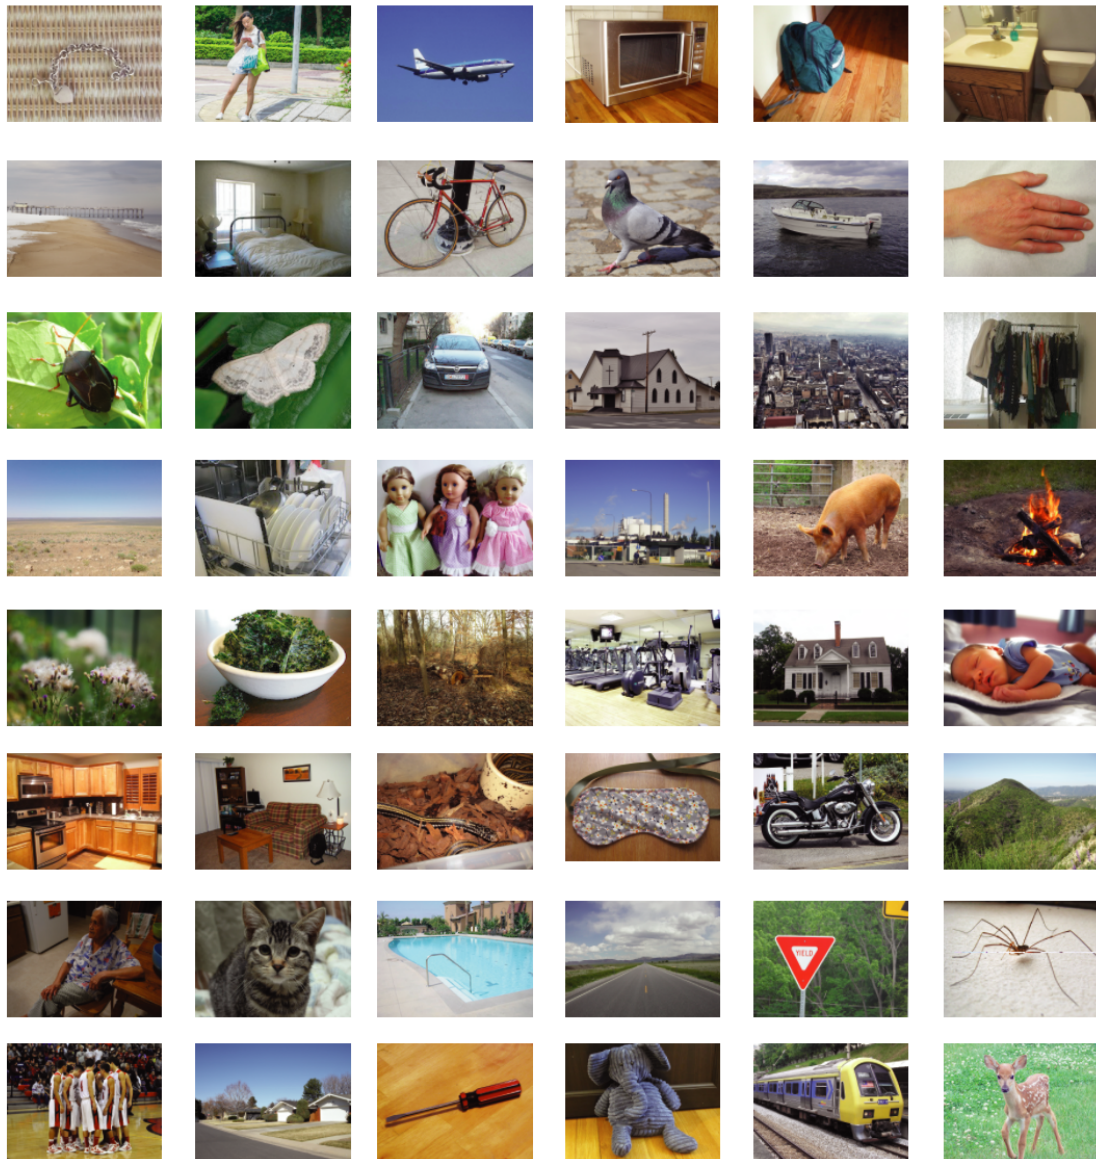

144

145 **Figure 1: Naturalistic image categories.** One exemplar from each of the 48 image categories, presented in alphabetical  
146 order: accessories, adults, airplanes, appliances, bags, bathrooms, beaches, beds, bikes, birds, boats, body parts, bugs,  
147 butterflies, cars, churches, cityscapes, clothes, deserts, dishes, dolls, factories, farm animals, fire, flowers, food, forests,  
148 gyms, houses, kids, kitchens, living rooms, lizards/snakes, masks, motorcycles, mountains, older adults, pets, pools, roads,  
149 signs, spiders, sports, suburbs, tools, toys, trains, wild animals.

150

151 *fMRI paradigm.* Participants were scanned while viewing the stimuli on a back-projected screen  
152 through a rear-view mirror that was mounted on the head coil. Stimuli were presented at a resolution

153 of 1024 x 768 pixels and subtended 20 x 15 degrees of visual angle. Individual scenes were  
154 presented in an event-related design for a duration of 500 ms, separated by a 5 s interval.  
155 Throughout the experimental run, a small fixation cross (<0.5 degrees) was presented in the center  
156 of the screen. Participants viewed all 144 images in either Image Set 1 or Image Set 2 while  
157 performing an unrelated fixation cross task. Simultaneous with the onset of each stimulus, either  
158 the vertical or horizontal arm of the fixation cross became slightly elongated. Participants were  
159 asked to indicate, via button response, whether the horizontal or vertical line of the fixation cross  
160 was longer. Both arms changed equally often within a given run, and arm changes were randomly  
161 assigned to individual stimuli. Participants completed 12 runs of the event-related experiment, with  
162 each run being composed of 156 TRs. Within each run, 48 images were presented such that after  
163 3 consecutive runs participants had viewed the entire set of 144 images. Thus, participants viewed  
164 4 complete repeats of the 144 images in total.

165

166 *Scanning parameters.* Participants were scanned on a research-dedicated Siemens 7 Tesla  
167 Magnetom scanner in the Clinical Research Center on the National Institutes of Health campus in  
168 Bethesda, Maryland. Partial T2\*-weighted functional image volumes of the frontal, temporal, and  
169 occipital cortices were acquired using a 32-channel head coil (47 slices; 1.6 x 1.6 x 1.6 mm isotropic  
170 voxels; 10 % interslice gap; TR 2 s; TE 27 ms; flip angle 70°, matrix size 126 x 126; FOV 200 mm).  
171 In all scans, oblique slices were oriented approximately parallel to the ventral portion of the  
172 prefrontal cortex. In addition, standard MPRAGE (magnetization-prepared rapid-acquisition  
173 gradient echo) and corresponding GE-PD (gradient echo–proton density) images were acquired,  
174 and the MPRAGE images were then normalized by the GE-PD images for use as a high-resolution  
175 anatomical image for the following fMRI data analysis (Van de Moortele et al., 2009).

176

177 *Functional localizers.* During each scan session, an independent functional localizer scan was also  
178 collected in each participant to identify scene and face selective regions in ventral temporal and  
179 lateral occipitotemporal cortex. The localizer used an on-off design, alternating between 16 s blocks  
180 of scene images and blocks of face images presented at 5 x 5° of visual angle. Localizer runs

181 comprised 144 TRs. Participants performed a one-back task, responding to immediate repeats of  
182 the same image using a button press.

183

184 *fMRI data preprocessing.* All imaging data were processed using the Analysis of Functional  
185 NeuroImages (AFNI) software package (<http://afni.nimh.nih.gov/afni>, RRID:SCR\_005927). Prior to  
186 statistical analyses, the functional scans were slice-time corrected and all images were motion  
187 corrected to the first image of the first functional run, after removing the appropriate number of  
188 'dummy' volumes (6) to allow for stabilization of the magnetic field. Following motion-correction,  
189 data were smoothed with a 2 mm full-width at half-maximum Gaussian kernel.

190

191 *Functionally defined ROIs.* Scene and face selective regions of interest (ROIs) were created for  
192 each participant based on the localizer runs. A response model was built by convolving a standard  
193 HRF function with the block structure for each run and was correlated to the activation time course.  
194 ROIs were generated by thresholding the statistical parametric maps at a threshold of  $p < 0.0001$   
195 (uncorrected). Contiguous clusters of voxels ( $> 20$ ) exceeding the defined threshold were defined  
196 as scene or face selective. The anatomical locations of these clusters were then inspected to  
197 ensure that the current ROIs were consistent with those described in previously published work  
198 (Kanwisher, 2010). Our functionally defined face-selective regions included the Fusiform Face Area  
199 (FFA) and Occipital Face Area (OFA), and our functionally defined scene-selective regions included  
200 the Parahippocampal Place Area (PPA) and the Occipital Place Area (OPA). Ventral early visual  
201 areas (vEVC) and dorsal early visual (dEVC) areas (V1-V3) were defined using previously acquired  
202 retinotopic field maps from independent participants (Silson et al., 2015, 2016a).

203

204 *Anatomically defined ROIs.* Anatomically defined ROIs were constructed using the Freesurfer  
205 image analysis suite, which is documented and freely available for download online  
206 (<http://surfer.nmr.mgh.harvard.edu/>). A ventral temporal cortical (vTC) region was defined using the  
207 lower edge of the inferior temporal sulcus as the lateral boundary, extending medially to include  
208 the collateral sulcus. Posteriorly, the vTC extended to the edge of the EVC ROIs and anteriorly to



209 the tip of the collateral sulcus This vTC ROI overlapped with both the functionally-defined FFA and  
210 PPA and was drawn to be analogous to the human IT ROI used by Kriegeskorte and colleagues  
211 (Kriegeskorte et al., 2008). In addition, a lateral occipitotemporal (IOTC) region was defined  
212 extending from the junction of the dorsal and ventral EVC ROIs anteriorly to the superior temporal  
213 sulcus, superiorly to the intraparietal sulcus and ventrally to the inferior temporal sulcus. This IOTC  
214 ROI overlapped with both the functionally-defined OFA and OPA and also included retinotopic  
215 regions such as V3A, LO1 and LO2 (Larsson and Heeger, 2006).

216

217 *fMRI analysis: event-related data.* All 12 functional runs were concatenated and compared to the  
218 activation time course for each stimulus condition using Generalized Least Squares (GLSQ)  
219 regression in AFNI. In the current paradigm, each image was treated as an independent condition,  
220 resulting in 144 separate regressors for each individual stimulus condition, as well as motion  
221 parameters and four polynomials to account for slow drifts in the signal. To derive the response  
222 magnitude per stimulus, t-tests were performed between the stimulus-specific beta estimates and  
223 baseline for each voxel. All subsequent analyses of these data were conducted in Matlab  
224 ([Mathworks, Natick](#), RRID:SCR\_001622). To derive representational dissimilarity matrices  
225 (RDMs), pairwise Pearson's correlations were computed between conditions using the t-values  
226 across all voxels within a given ROI (Kravitz et al., 2010, 2011). The resulting RDM for a given ROI  
227 was a 144 x 144 matrix representing the pairwise correlations between patterns of activity elicited  
228 by each stimulus condition. RDMs were created for each participant, ranked using a tied ranking  
229 procedure, and then averaged together across participants for each ROI.

230

231 *Behavior-fMRI comparisons.* We calculated full correlations between behavioral judgment RDMs  
232 and each of the fMRI derived RDMs (Spearman's  $\rho$ ). For all analyses, the behavioral RDMs were  
233 based on averages across the maximum number of participants available for that analysis (e.g., all  
234 20 subjects that performed the behavioral experiment for the group-average behavioral judgments;  
235 all 10 subjects that performed the behavioral task on Image Set 1 for the group average behavioral  
236 RDM of Image Set 1), with the exception of the within-subject behavior-fMRI comparisons (Figure

237 4) in which only the participants that also performed the fMRI experiment were included. Statistical  
238 significance of between-RDM correlations was determined using fixed-effects stimulus-label  
239 randomization tests (Nili et al., 2014). For these tests, a null distribution of between-RDM  
240 correlations was obtained by permuting stimulus condition labels of one of the subject-averaged  
241 RDMs (e.g., behavioral RDM) 10,000 times, after which the p-value of the observed correlation was  
242 determined as its two-tailed probability level relative to the null distribution. In addition, 95%  
243 confidence intervals and standard deviations were determined using bootstrap resampling,  
244 whereby a distribution of correlation values was obtained by sampling stimulus conditions with  
245 replacement ( $n = 10,000$  bootstraps). To correct for multiple testing of the behavioral RDM against  
246 the multiple fMRI ROIs, the resulting  $p$ -values were corrected for multiple comparisons across all  
247 ROIs using FDR-correction at  $\alpha = 0.05$ .

248

249 *Hierarchical clustering.* To reveal higher-order relations between the image categories, the  
250 behavioral and fMRI measurements were subjected to hierarchical clustering. To estimate the  
251 number of clusters that best described the data, we performed k-means clustering ('kmeans'  
252 function implemented in Matlab, 28 iterations) and evaluated the trade-off between number of  
253 clusters and explained variance using the elbow method. Using this method, we determined that  
254 six clusters optimally described the behavioral data (80% variance explained in each image set).  
255 We subsequently performed hierarchical clustering on both the behavioral judgement RDMs and  
256 fMRI derived RDMs ('cluster' function in Matlab, method: 'linkage', number of clusters: 6).

257

258 *Searchlight analysis.* To test the relationship between behavioral similarity judgments and activity  
259 recorded outside specified ROIs, we conducted whole-brain searchlight analysis. The searchlight  
260 analysis stepped through every voxel in the brain and extracted the t-values from a sphere of 3  
261 voxel radius around that voxel (total number of voxels per searchlight sphere = 123), which were  
262 then used to compute pairwise correlation distances (1-Pearson's  $r$ ) between each stimulus  
263 condition. Analogous to the ROI analyses, the resulting RDMs were correlated (Spearman's  $\rho$ )  
264 with the average behavioral RDM. These correlation coefficients were assigned to the center voxel



265 of each searchlight, resulting in a separate whole-volume correlation map for each participant  
266 computed in their native volume space. To allow comparison at the group level, individual  
267 participant maps were first aligned to their own high-resolution anatomical T1 and then to surface  
268 reconstructions of the grey and white matter boundaries created from these T1s using the  
269 Freesurfer (<http://surfer.nmr.mgh.harvard.edu/>, RRID:SCR\_001847) 5.3 autorecon script using  
270 SUMA (Surface Mapping with AFNI) software (<https://afni.nimh.nih.gov/Suma>). Group-level  
271 significance was determined by submitting these surface maps to node-wise *t*-tests in conjunction  
272 with Threshold Free Cluster Enhancement (Smith and Nichols, 2009) to correct for multiple  
273 comparisons, using the CoSMoMVA toolbox (Oosterhof et al., 2016).

274

275 *DNN comparisons.* Deep convolutional neural networks (DNNs) are state-of-the-art computer  
276 vision models capable of labeling objects in natural images with human-level accuracy (Krizhevsky  
277 et al., 2012; Kriegeskorte, 2015), and are therefore considered potentially relevant models of how  
278 object recognition may be implemented in the human brain (Kriegeskorte, 2015; Yamins and  
279 DiCarlo, 2016; Scholte, 2017; Tripp, 2017). DNNs consist of multiple layers that perform  
280 transformations from pixels in the input image to a class label through a non-linear mapping of local  
281 convolutional filters responses (layers 1–5) onto a set of fully-connected layers of classification  
282 nodes (layers 6–8) culminating in a vector of output ‘activations’ for labels assigned in the DNN  
283 training phase. Inspection of the learned feature selectivity (Zhou et al., 2014; Güçlü and van  
284 Gerven, 2015; Bau et al., 2017; Wen et al., 2017) show that earlier layers contain local filters that  
285 resemble V1-like receptive fields while higher layers develop selectivity for entire objects or object  
286 parts, perhaps resembling category-selective regions in visual cortex. The feature representations  
287 learned by these DNNs have indeed been shown to exhibit some correspondence with both  
288 behavior and brain activity measurements in humans and non-human primates during object  
289 recognition (Khaligh-Razavi and Kriegeskorte, 2014; Yamins et al., 2014; Güçlü and van Gerven,  
290 2015; Cichy et al., 2016) and scene recognition (Greene et al., 2016; Bonner and Epstein, 2017;  
291 Martin Cichy et al., 2017; Groen et al., 2018).

292 We used the MatConvNet toolbox (Vedaldi and Lenc, 2015) to implement a pre-trained  
293 version of an 8-layer deep convolutional neural network (VGG-S CNN) (Chatfield et al., 2014) that  
294 was trained to perform the 1000-class ImageNet ILSVRC 2012 object classification task. DNN  
295 representations for each individual image in both stimulus sets were extracted from layers 1-5  
296 (convolutional layers) and 6-8 (fully-connected layers) of the network. For each layer, we calculated  
297 the Pearson correlation coefficient between each pairwise combination of stimuli yielding one 144  
298 x 144 RDM per DNN layer. Analogous to the behavior-fMRI analyses, we then calculated  
299 Spearman's rank correlations between RDMs derived from DNN layers and RDMs derived from  
300 the fMRI and behavioral measurements. Statistical significance was again determined using  
301 stimulus-randomization ( $n = 10,000$  permutations, two-tailed tests). Differences in correlation  
302 between individual layers were determined using bootstrap tests ( $n = 10,000$ ) whereby the p-value  
303 of a difference in correlation between two layers was estimated as the proportion of bootstrap  
304 samples further in the tails (two-sided) than 0 (Nili et al., 2014). To correct for multiple testing of  
305 several model representations against the same RDM, the resulting p-values were corrected for  
306 multiple comparisons across all tests conducted for a given behavioral or fMRI RDM using FDR-  
307 correction at  $\alpha = 0.05$ .

308

## 309 **Results**

310

311 The primary aim of this study was to elucidate the representational space of complex naturalistic  
312 categories as reflected in human behavior and in neural responses measured with fMRI. We first  
313 present analyses examining and comparing the representational structure of each image set  
314 estimated from both behavioral similarity judgments and from fMRI responses in visual cortex. We  
315 then examine to what extent features derived from a deep neural network (DNN) model can explain  
316 the behavioral and fMRI data.

317

318 *Comparison of behavioral judgments and fMRI: Representational Dissimilarity Matrices (RDMs)*

319

320 We first created RDMs based on both the behavioral judgments and fMRI responses, separately  
321 for Image Set 1 and Image Set 2. For behavioral judgments, dissimilarities were based on the pixel  
322 distances between images in the multi-arrangement similarity task. For fMRI, we focused on the  
323 pairwise comparisons of multi-voxel patterns for each stimulus in ventral temporal cortex using a  
324 vTC ROI following Kriegeskorte and colleagues (Kriegeskorte et al., 2008; see Methods). The  
325 resulting RDMs are organized alphabetically by category (Figure 2).

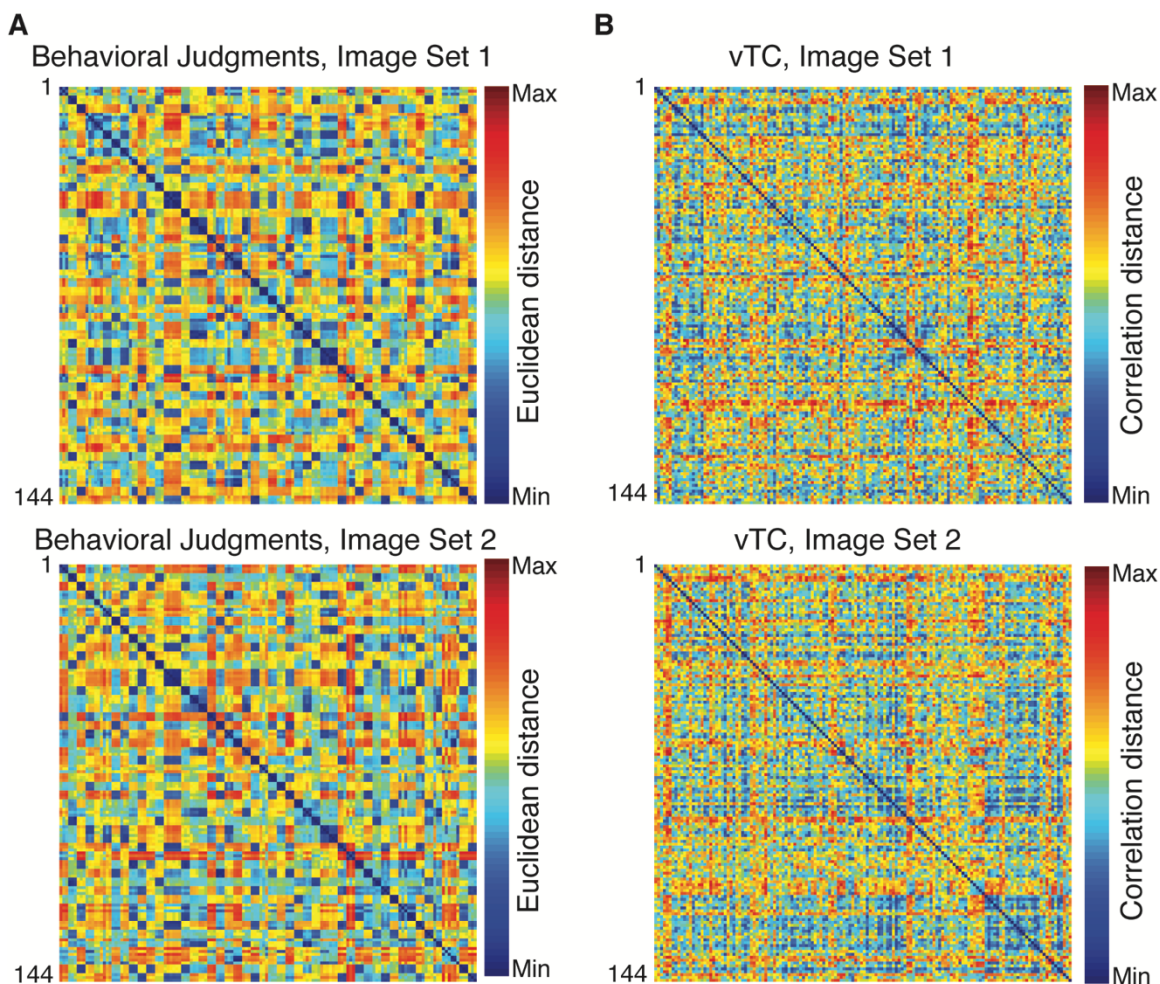

326

327 **Figure 2: Representational dissimilarity matrices for Image Set 1 and Image Set 2.** Matrices show comparisons for all  
328 144 images grouped alphabetically by category (3 images per category, same order as Figure 1). A) Behavioral dissimilarity  
329 was measured as the Euclidean distance between pairs of images in the multi-arrangement task. Clustering-by-category is  
330 evidenced by the appearance of 3 x 3 exemplar 'blocks' exhibiting low dissimilarity along the diagonal. B) fMRI dissimilarity  
331 was measured as 1 minus the pairwise correlation between the pattern of response to images in vTC. There is some  
332 clustering-by-category present, but it is less evident than for the behavioral judgments.

333 For behavioral judgments, these RDMs exhibit a clear clustering of exemplars within each  
334 category for both image sets (Figure 2A). Participants judged exemplars of the same category as  
335 more similar to other exemplars within the same category than to exemplars in different categories  
336 (e.g. body parts are more similar to body parts than to mountains). In contrast, there was much less  
337 clustering of exemplars for the vTC RDMs, even within category (Figure 2B). The striking difference  
338 between behavioral and fMRI RDMs is reflected in weak, albeit significant, correlations between  
339 the two measures (Image Set 1,  $\rho = 0.06$ , 95% CI = [0.02, 0.14],  $p = 0.012$ ; Image Set 2,  $\rho =$   
340  $0.07$ , CI = [0.03, 0.15],  $p = 0.004$ ), suggesting limited similarity in the representation of the images  
341 at the image level in behavioral similarity judgements and vTC.

342 To quantify the extent of category coherence in each image set, we calculated a  
343 Category Index as the difference between the average within-category distance and the average  
344 between-category distance (Figure 3A). For both behavioral judgments and vTC, this Category  
345 Index was greater than zero for both image sets (behavior Image Set 1: one-sample t-tests:  $t(47)$   
346  $= 41.6$ , CI = [0.40, 0.45],  $p < 0.0001$ ; behavior Image Set 2:  $t(47) = 44.3$ , CI = [0.42, 0.46],  $p <$   
347  $0.0001$ ; vTC Image Set 1:  $t(47) = 5.2$ , CI = [0.05, 0.11],  $p < 0.0001$ ; vTC Image Set 2:  $t(47) = 6.3$ ,  
348 CI = [0.05, 0.09],  $p < 0.0001$ ), indicating the presence of significant categorical structure in both  
349 domains. However, categorization was much stronger for the behavioral judgments compared to  
350 vTC (independent samples t-test:  $t(94) = 29.7$ , CI = [0.34, 0.39],  $p < 0.001$ ).

351 Given the presence of significant categorical structure in both domains, and to directly  
352 compare Image Set 1 and Image Set 2, which contained different exemplars for each category,  
353 we averaged across exemplars (excluding the diagonal), reducing our 144 x 144 exemplar-level  
354 RDMs to 48 x 48 category-level RDMs. For both behavioral judgments and vTC there was a  
355 strong positive correlation between Image Set 1 and Image Set 2 (behavioral judgments,  $\rho =$   
356  $0.64$ , CI = [0.55, 0.76],  $p < 0.0001$ ; vTC,  $\rho = 0.48$ , CI = [0.32, 0.67],  $p < 0.0001$ ), indicating that  
357 the representational structure in both domains is reproducible across image sets.

358 Given this reproducibility of representational structure across image sets in both behavior  
359 and vTC, we averaged across sets to compare the representational space at a category-level  
360 between behavior and vTC (Figures 3B, C). Similar to the exemplar level, there was only a weak,

361 albeit significant, correlation between behavioral judgments and vTC ( $\rho = 0.10$ , CI = [0.02,  
362 0.32],  $p = 0.019$ ). Notably, this correlation was weaker than the relationship between Image Set 1  
363 and Image Set 2 within behavior and vTC separately (Fisher'  $r$  to  $z$  transformation: behavior-vTC  
364 correlation vs. behavior-behavior Image Set correlation:  $z(48) = 3.1$ ,  $p = 0.002$  (two-tailed);  
365 behavior-vTC correlation vs. vTC-vTC Image Set correlation:  $z(48) = 2.0$ ,  $p = 0.045$  (two-tailed)).  
366 Thus, at both the exemplar and category level there was only weak agreement between the  
367 representational structure reflected in behavioral judgments and that derived from vTC, despite  
368 reliable representational structure across image sets for both behavioral judgments and vTC.  
369

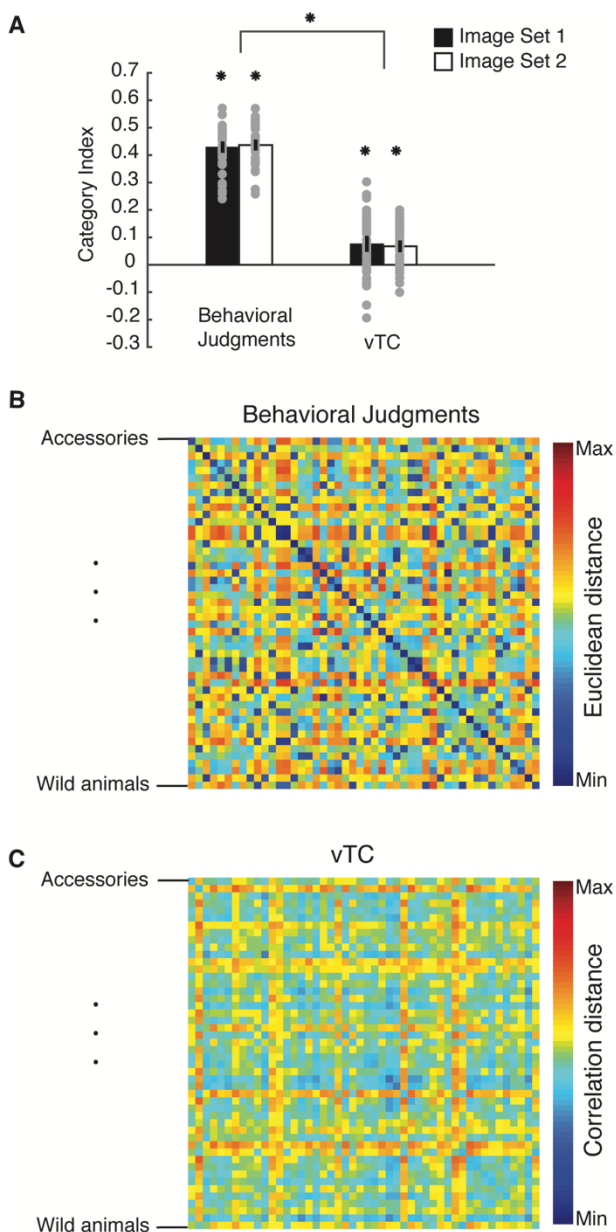

370

371 **Figure 3: Category representations.** a) Category indices for vTC and behavioral similarity judgements calculated as the  
372 difference between the average within-category and between-category distances, averaged across categories. Gray dots  
373 indicate indices for each category separately. Error bars indicate 95% confidence intervals estimated from a one-sample *t*-  
374 test. \* =  $p < 0.001$ . b), c) RDMs averaged by category for behavioral similarity judgements and fMRI responses in vTC.  
375 Categories are ordered alphabetically in the matrices.

376

377 The difference between the representational structure in behavior and vTC may be due to  
378 greater variation in the structure across individuals. To address this question, we compared the  
379 representational structure from behavior and vTC of the individual participants (Figure 4). This

380 analysis was consistent with the group-level findings: in general, across participants, correlation  
381 within an experimental measure (behavior, vTC response) was greater than zero (behavior: range  
382  $\rho = [0.05, 0.47]$ ; vTC: range  $\rho = [-0.02, 0.41]$ ), suggesting that within a domain the structure of  
383 representation was consistent across individuals. However, between experimental measures,  
384 correlations were weaker (range  $\rho = [-0.06, 0.18]$ ), even for the same participant. Thus, there  
385 was not a strong relationship between a single participant's behavioral RDM and his or her own  
386 vTC RDM.

387

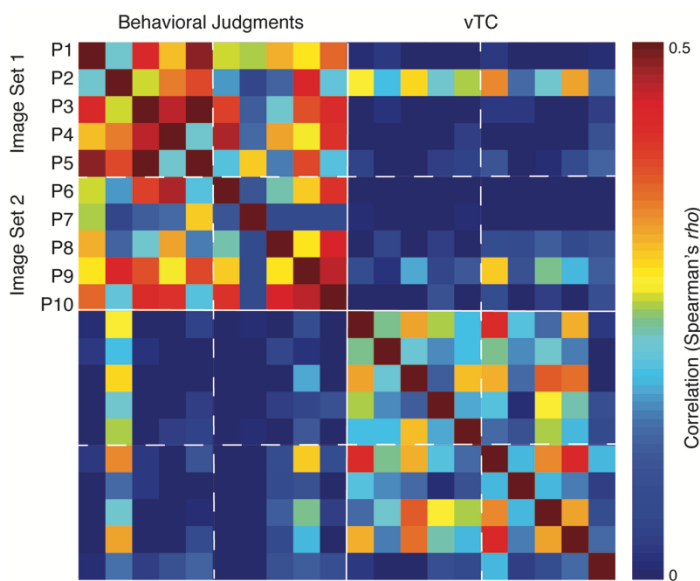

388

389 **Figure 4: Comparison of individual participant RDMs.** At the individual participant level correlations between RDMs for  
390 behavioral similarity judgements and fMRI responses in vTC (lower left, upper right quadrant) were weaker than those within  
391 each experimental measure (upper left and lower right quadrant). Thus, an individual's behavioral RDM tended to be more  
392 correlated to another subject's behavioral RDM than to their own vTC RDM.

393

#### 394 *Structure of category representations: Hierarchical Clustering*

395

396 To investigate the nature of the category representational structure, we conducted hierarchical  
397 clustering analyses (see Materials and Methods). For behavioral similarity judgements, a group of  
398 clear and intuitively meaningful clusters emerged, including clusters that appear to reflect 'urban  
399 landscapes', 'transportation', 'humans', 'household items', 'animals/insects', and 'natural scenes'



400 (Figure 5A, left). The first branching point in the dendrogram separates animals/insects and natural  
401 scenes from all other categories. Thus, animal categories (e.g. farm animals, wild animals) were  
402 not grouped with people (i.e. by animacy), but rather were grouped closest to natural objects and  
403 scenes (e.g. fire, flowers, beaches). Human categories (e.g. adults, older adults, kids, sports, and  
404 body parts) were grouped most closely to people-related objects (e.g. human food, airplanes,  
405 trains, bikes) and people-related places (e.g. living rooms, kitchens). These results suggest that  
406 behaviorally, participants tended to group images into manmade (including humans) and natural  
407 categories (including animals).

408 In contrast, however, hierarchical clustering based on data derived from vTC revealed a  
409 relationship between categories that is much harder to characterize (Figure 5b, left). In general, it  
410 appears that some categories containing stimuli with faces and/or bodies (e.g. wild animals, pets,  
411 dolls, older adults, kids, adults) were represented as similar to one another and distinct from all  
412 other categories in vTC, a division that is reflected in the first branching point of the dendrogram.  
413 However, there is not a clean grouping of images containing faces and/or bodies from all others  
414 since some categories containing faces or bodies (e.g. farm animals, masks) were not contained  
415 in the same cluster. In terms of a possible animate/inanimate distinction, it is clear that many  
416 animate categories (e.g. lizards/snakes, spiders) were clustered with inanimate categories (e.g.  
417 food, flowers, boats, etc.).

418 Applying the hierarchical clustering orders to the behavioral and vTC RDMs (Figure 5A, B  
419 right) highlights the differences between the behavioral and vTC RDMs. When the behavioral  
420 clustering order is applied to the vTC RDM, very little structure is present except for the grouping  
421 of the categories of kids, adults and older adults, which were relatively more similar to each other  
422 than any other categories except for farm animals, wild animals and pets. This suggests some  
423 similarities in the representation of kids, adults and older adults between behavior and vTC. When  
424 the vTC clustering order is applied to the behavioral RDM, many of the clusters in the behavioral  
425 data become fragmented, but some groupings remain. For example the grouping of older adults,  
426 kids and adults is clear as well as that of farm animals, butterflies and birds.



427 In sum, the hierarchical clustering reveals no evidence for a separation of animate and  
428 inanimate categories in either the behavioral or the vTC RDM. Moreover, we observe clear  
429 differences in the representational structure of the behavioral and vTC RDMs, with more discrete  
430 clustering in the behavioral compared to the fMRI domain. The one clear consistency between the  
431 behavioral and vTC RDMs is the grouping of the kids, adults and older adults categories. In the  
432 next section, we consider whether the differences between the behavioral and vTC RDMs reflect  
433 the particular ROI chosen for the fMRI data.

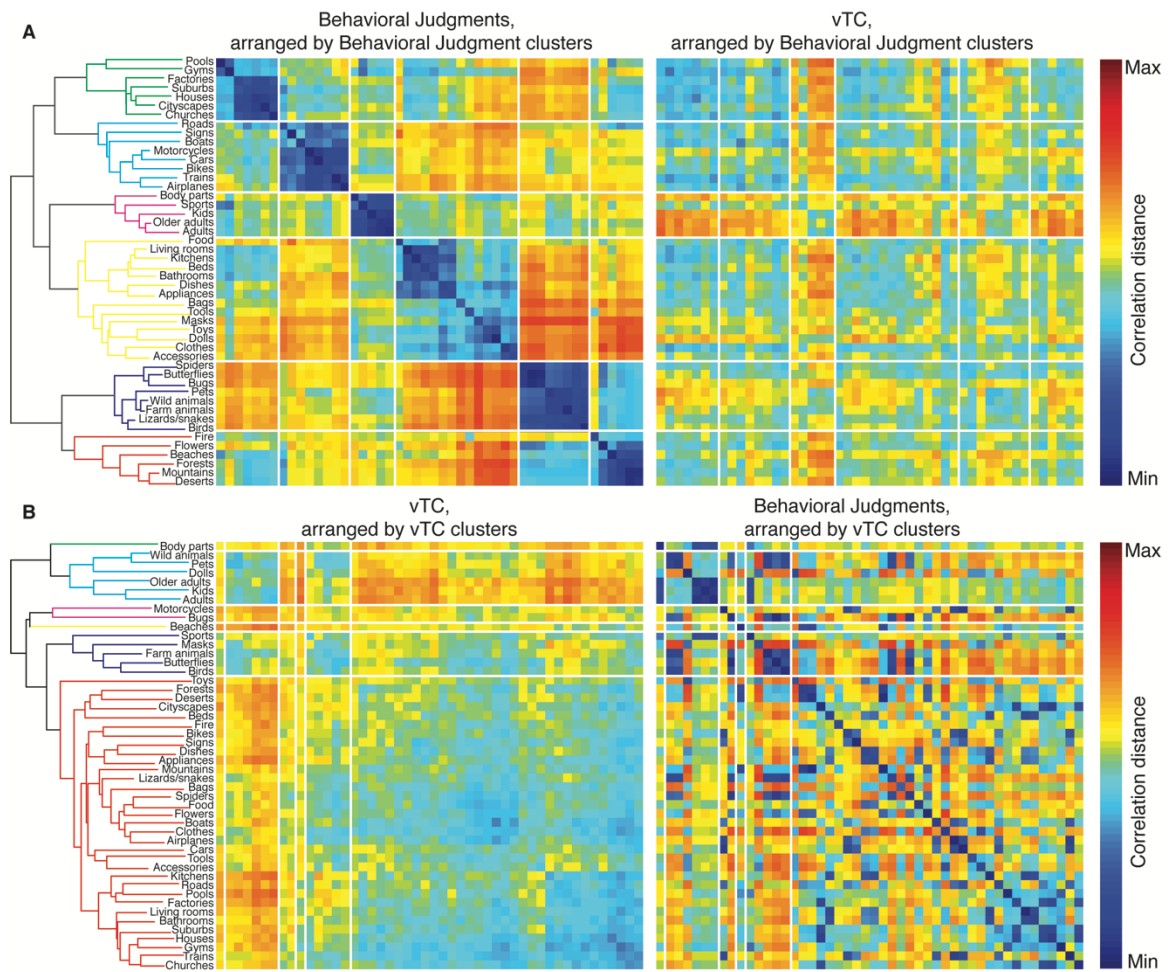

434

435 **Figure 5: Hierarchical clustering of behavioral and vTC RDMs.** A) Hierarchical clustering of behavioral similarity  
436 judgments. RDMs for behavior (left) and vTC (right) arranged in the behavioral dendrogram order. B) Hierarchical clustering  
437 of vTC dissimilarity. RDMs for vTC (left) and behavioral judgments (right) arranged in the vTC dendrogram order.  
438 Dendrograms are colored according to the top six clusters and the white lines on the RDMs show the boundaries between  
439 these clusters.

440

441 *Beyond the vTC ROI*

442

443 To investigate whether the weak relationship observed between the behavioral and vTC RDMs  
444 reflects the *a priori* choice of ROI, we identified a number of other ROIs in visual cortex and  
445 conducted a series of exploratory analyses to determine if any of these regions are more closely  
446 correlated with the representational structure that emerged in the behavioral similarity judgments.

447 First, we defined a series of new ROIs using either independent functional localizers and  
448 anatomical constraints (see Methods and Figure 6A). In particular, we examined i) a high level  
449 visual region in lateral occipitotemporal cortex (IOTC), analogous to the vTC, incorporating face-,  
450 scene-, and object-selective regions, ii) functionally-defined category-selective regions, including  
451 both face-selective (FFA and OFA) and scene-selective (PPA and OPA) regions in ventral temporal  
452 and lateral occipital cortex, respectively and iii) early visual cortex (EVC) ROIs (combining V1-V3)  
453 subdivided into a dorsal (dEVC) and ventral (vEVC) division. We compared the RDMs for each ROI  
454 across Image Set 1 and Image Set 2 and also correlated them with the RDM for behavioral  
455 judgments.

456 The diagonal of the ROI comparison matrix (Figure 6B) indicates the reliability of the  
457 representational structure across image sets and participants. There are clear differences in the  
458 strength of the correlations for the different ROIs. In general, reliability was higher for the ventral  
459 compared to the dorsal ROIs (vTC vs. IOTC, vEVC vs. dEVC, FFA vs. OFA, PPA vs. OPA).  
460 Further, the representational structure differed across ROIs. For example, the representational  
461 structure in the EVC ROIs was very different from that observed in the higher-level ROIs. The vTC  
462 ROI, which we used in our analyses so far, varied in its relationship with the other ROIs, showing  
463 highest similarity with PPA and IOTC, and lowest with dEVC and vEVC.

464 For behavior, we compared the RDM for each ROI with the behavioral similarity RDM. PPA  
465 showed the strongest correlation ( $\rho = 0.22$ , CI = [0.08, 0.46],  $p < 0.0001$ ) followed by OPA ( $\rho$   
466 = 0.16, CI = [0.07, 0.38],  $p < 0.0001$ ) (Figure 6C), although these correlations were again much  
467 weaker than the correlation of the PPA RDM across image sets ( $\rho = 0.41$ , CI = [0.28, 0.59],  $p =$   
468 0.0002). The weakest relationship was observed for FFA, which actually showed a trend towards

469 a negative correlation ( $\rho = -0.09$ , CI = [-0.13, 0.10],  $p = 0.06$ ), despite showing a strong positive  
 470 correlation across image sets ( $\rho = 0.49$ , CI = [0.38, 0.63],  $p < 0.0001$ ).

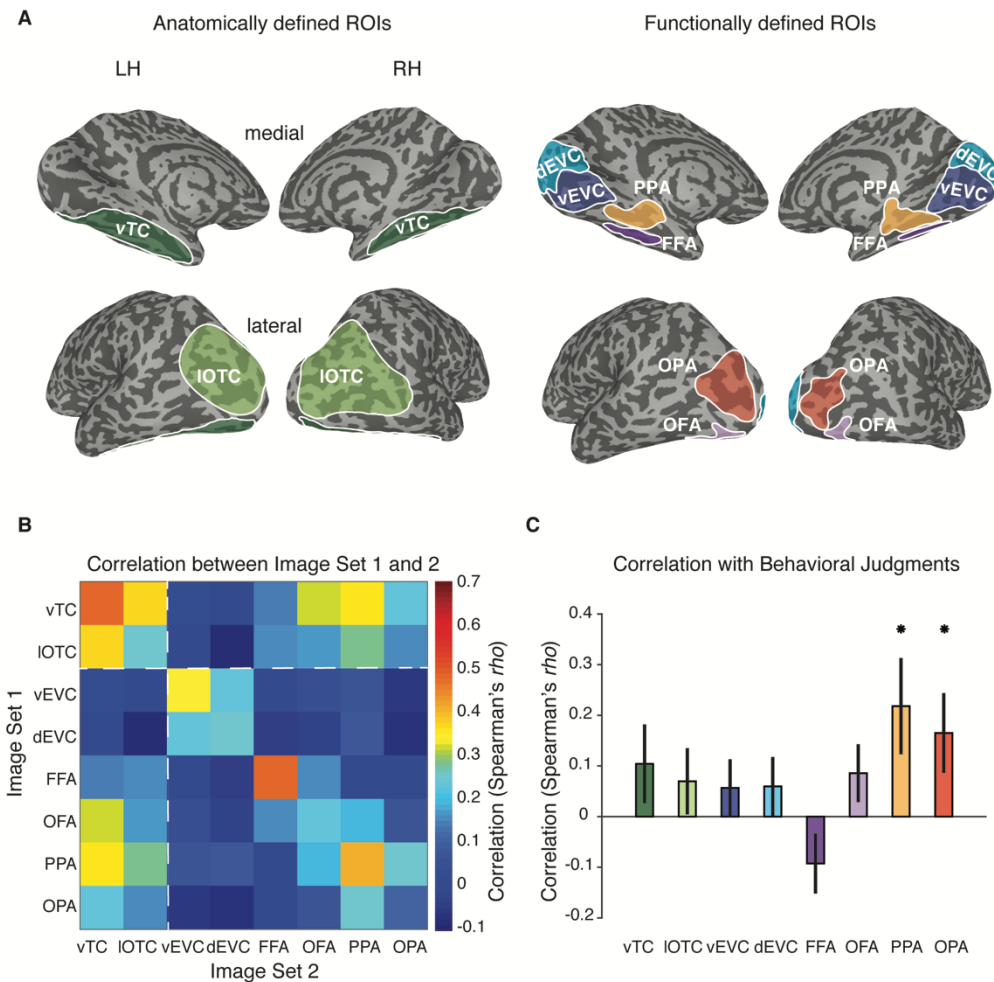

471

472 **Figure 6: Comparison of multiple visual cortical ROIs.** A) Anatomically (left) and functionally defined (right) ROIs.  
 473 Anatomical and category-selective ROIs were defined in each individual participant. Early visual cortex ROIs were defined  
 474 at a group-level in an independent set of participants. B) Correlation between the RDMs for each region of interest.  
 475 Correlations are computed between participants viewing Image Set 1 and those viewing Image Set 2. ROIs included high-  
 476 level visual cortex on the ventral (vTC) and lateral (lateral occipitotemporal cortex, IOTC) surfaces, dorsal and ventral early  
 477 visual cortex (dEVC, vEVC), face-selective (OFA, FFA) and scene-selective (OPA, PPA) cortex. Correlations within a ROI  
 478 were higher on the ventral compared to the lateral/dorsal cortex for all pairs of regions. C) Correlation between the average  
 479 behavioral RDM and the RDM for each ROI. \* Significant correlations (FDR-corrected) relative to zero (two-tailed) as  
 480 assessed with a permutation test ( $n = 10,000$ ). Error bars reflect the standard deviation of the bootstrap distribution of  
 481 correlation values. The strongest correlation was observed in PPA and the weakest in FFA. Note that the multiple  
 482 comparisons correction renders the correlation between behavior and vTC reported in our earlier analyses no longer  
 483 significant.

484 Second, we conducted an exploratory searchlight analysis to examine any other brain  
485 areas that might show a relationship to the representational structure of the stimuli that emerged in  
486 behavioral similarity judgments. Our slice prescription included all of occipital, temporal and parietal  
487 cortex, but not frontal regions. The strongest brain-behavior correlation emerged in areas  
488 corresponding to scene-selective regions PPA and OPA (Figure 7), as well as a medial parietal  
489 region that seems to correspond to a third scene-selective region (medial place area, MPA, also  
490 referred to as retrosplenial complex, RSC (Epstein, 2008; Silson et al., 2016b).

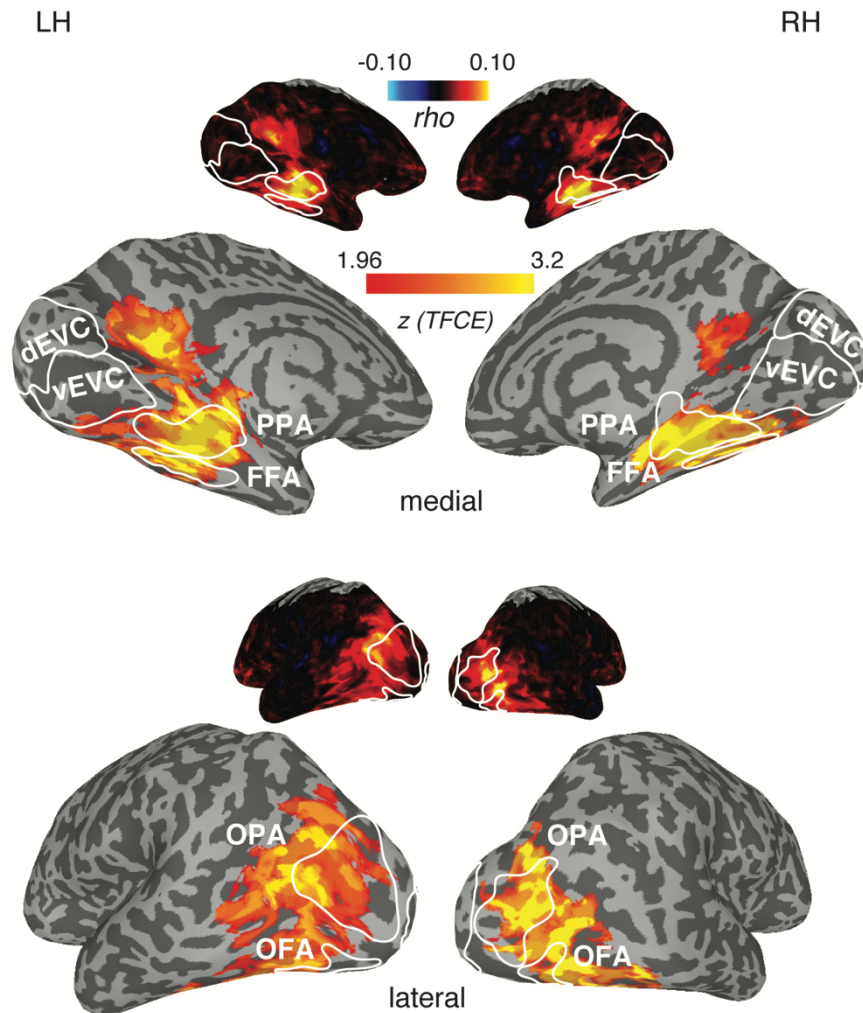

491  
492 **Figure 7: Behavioral RDM searchlight results.** The strongest correlations with the behavioral RDM were observed in  
493 scene-selective regions OPA and PPA. There was also a strong correlation in medial parietal cortex that likely corresponds  
494 to a third scene-selective region, MPA (medial place area). Small brains show the unthresholded correlation values and  
495 large brains are cluster-corrected for multiple comparisons using Threshold-Free Cluster Enhancement (thresholded on

496  $z = 1.94$ , corresponding to two-sided  $p < 0.05$ ). Group-level results are overlaid on the freesurfer reconstruction of one  
497 example participant, with the corresponding functionally-defined ROIs highlighted in solid white lines.

498

499 Taken together, these data indicate the strongest relationship between the representational  
500 structure of behavioral similarity judgments and fMRI responses is in scene-selective cortex,  
501 particularly PPA, followed by OPA, while the weakest relationship was observed for FFA. This could  
502 be considered surprising, given that the one clear consistency between the behavioral judgments  
503 and fMRI responses in vTC (a large ROI that encompasses both PPA and FFA) appeared to reflect  
504 a grouping of the adults, kids and older adults categories, which are image categories that FFA  
505 responds strongly to, but PPA does not. To further explore the origin of this correspondence, we  
506 next examined the representational structure in PPA and FFA and their relation with the behavioral  
507 dissimilarity in more detail.

508

#### 509 *Representation of human categories in PPA and FFA*

510

511 Hierarchical clustering (Figure 8) indicated that both PPA and FFA contained an early branching of  
512 a cluster that included adults, kids and older adults, similar to the larger vTC ROI. However, in PPA,  
513 this cluster also included body parts, while in FFA this cluster also included sports (which typically  
514 contained people) and dolls. Further, inspection of their respective RDMs (Figure 9A) revealed  
515 some clear differences in representational structure. While for both FFA and PPA the categories of  
516 adults, kids and older adults showed strong dissimilarity with most other categories (presumably  
517 resulting in them being grouped separately in a cluster in both cases), in FFA these categories  
518 were also similar to one another, as well as to pets, wild animals and farm animals. In contrast,  
519 PPA showed no such grouping by similarity of these categories, instead exhibiting high similarity  
520 between urban scenes such as houses, cityscapes and churches, categories that were highly  
521 dissimilar from one another in FFA.

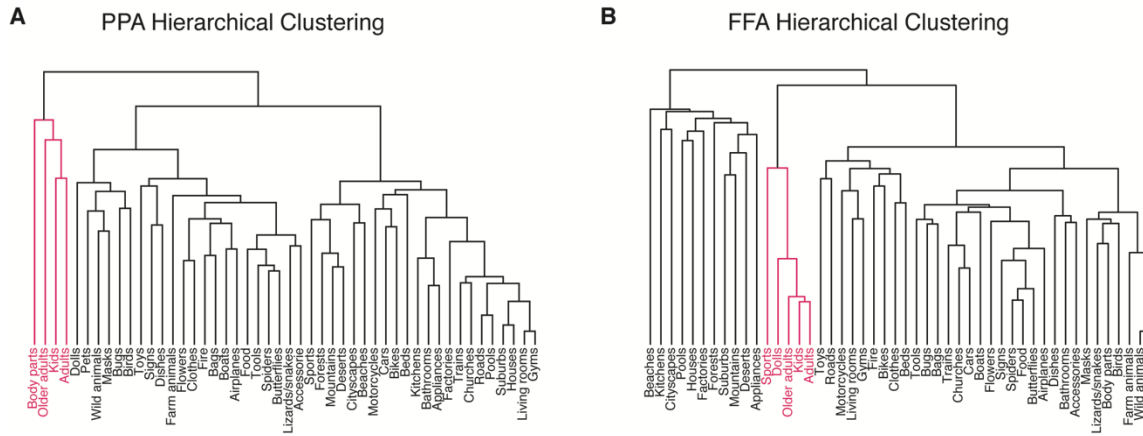

522

523 **Figure 8: PPA versus FFA: hierarchical clustering.** A) Hierarchical clustering of representational dissimilarity in scene-  
524 selective PPA indicated the presence of a face- and body-selective cluster (first branch) containing the categories adults,  
525 kids and older adults, as well as body parts. B) Hierarchical clustering of face-selective FFA indicated a face-selective  
526 cluster (second branch) containing adults, kids and older adults, as well as sports (which typically included people) and  
527 dolls.

528

529 This difference between the PPA and FFA RDMs was further highlighted when the  
530 correlation between PPA or FFA and behavioral judgments was computed for each category  
531 separately (Figure 9B). High correlations indicate that the category was similarly represented in the  
532 fMRI and behavioral RDM, while low or negative correlations indicate differences in the  
533 representational structure. For PPA, most categories showed a positive correlation, with the  
534 strongest correlations for urban landscapes such as factories, houses and cities. The lowest  
535 correlations were observed for categories containing humans or faces such as adults, kids, masks  
536 and dolls. In contrast, in FFA, most of the correlations were negative, indicating a striking difference  
537 in the representational space for most categories. The strongest positive correlations were  
538 observed for categories containing people and for animals. Collectively these analyses suggest  
539 that PPA and FFA each capture different aspects of the behavioral similarity judgements.

540 In sum, comparisons of regions beyond the vTC ROI suggest that representational  
541 structure was most reliable for ventral regions, with clear differences in representational structure  
542 between regions. Out of all ROIs examined, scene-selective regions correlated best with behavior,  
543 and this observation was supported by the searchlight results. However, relative to the  
544 reproducibility within the fMRI domain, the magnitude of the fMRI-behavior correlations remained



545 relatively weak. The separation of the kids, adults and older adults categories that we observed for  
 546 vTC was evident in hierarchical clusters obtained for both PPA and FFA. However, for PPA, the  
 547 correlation with behavior was driven by non-face categories, while FFA only correlated weakly with  
 548 behavior for those categories and exhibited limited correspondence for other categories.  
 549 Collectively, these results suggest that neither ROI fully captured the representational structure  
 550 reflected in the behavioral judgments. To better understand what is being represented in behavioral  
 551 judgements and fMRI responses, we next considered a third domain of representation:  
 552 computational modeling.

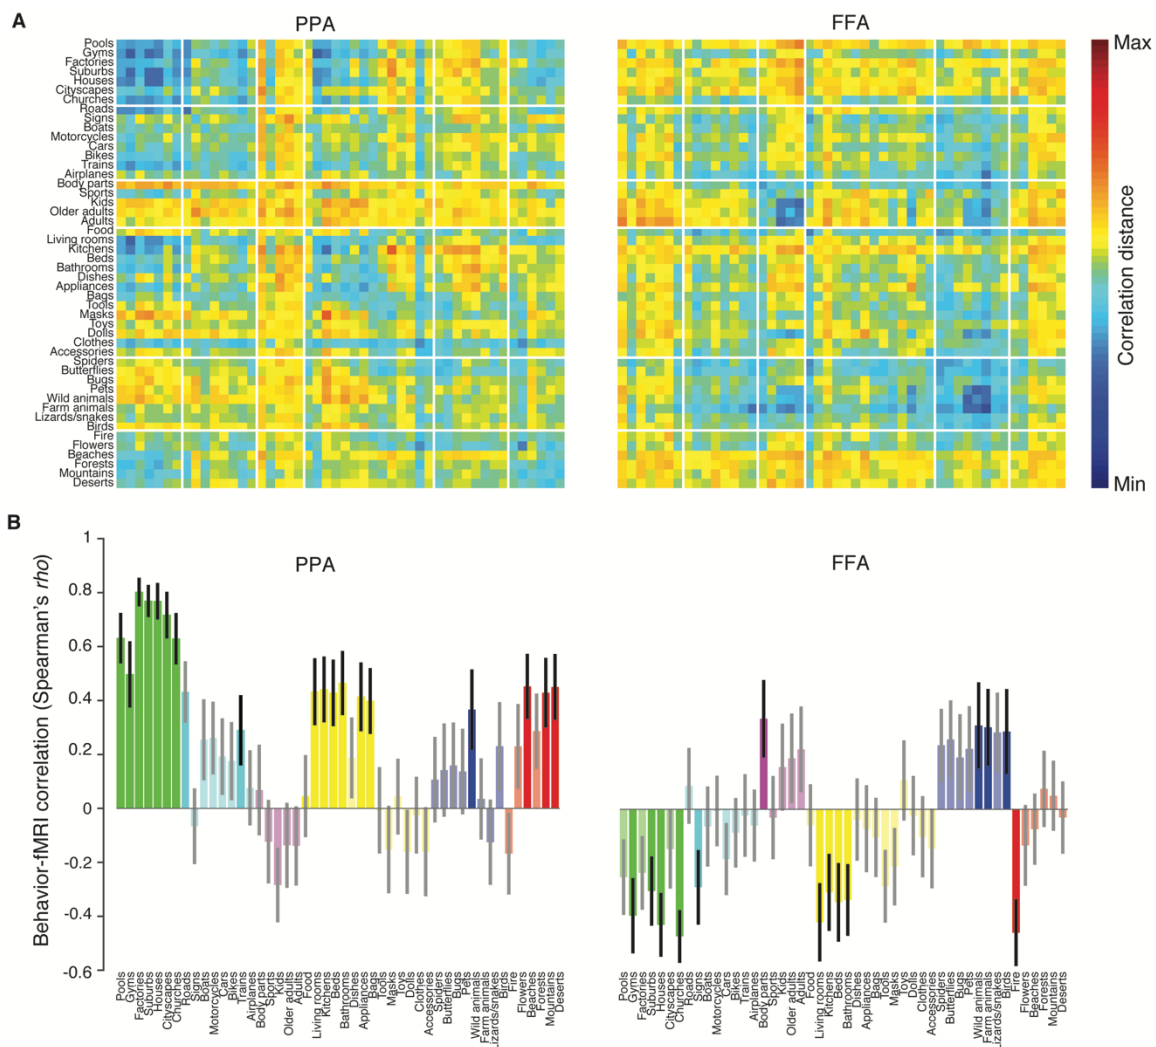

553

554 **Figure 9: PPA versus FFA: RDMs and individual category correlation with behavior.** A) RDMs of PPA and FFA  
 555 arranged in the behavioral clustering order. Superimposed white lines indicate the clusters derived from the behavioral  
 556 judgements RDM (see Figure 5A). B) For each category, correlations were computed between PPA (left) or FFA (right)

557 dissimilarity and behavioral dissimilarity (Spearman's  $\rho$ ). Individual correlations are color-coded by the clusters derived  
558 from behavioral judgments. Significant correlations are depicted as opaque bars, while non-significant correlations are  
559 transparent. Significance was assessed using a permutation test with 10,000 permutations per category ( $p < 0.05$ , two-  
560 tailed). Error bars reflected the standard deviation of the bootstrap distribution of correlations (10,000 bootstraps).

561

### 562 *DNN comparisons with fMRI responses and behavioral judgments*

563

564 In light of previous reports showing a correspondence between DNNs and both behavioral  
565 judgments and brain activity measurements in humans and non-human primates, we next  
566 examined to what extent DNN representations were able to explain the representational structure  
567 observed in our current data. In particular, given the discrepancy between our fMRI and behavioral  
568 measurements, we were interested to determine which of the two domains corresponded more  
569 strongly with the DNN representations.

570 We created RDMs based on DNN representations for individual layers of an 8-layer, off-  
571 the-shelf pre-trained DNN (see Materials and Methods), separately for Image Set 1 and Image Set  
572 2. Dissimilarities were calculated as the correlation distances between the vectorized responses  
573 across all units within a given layer. Similar to the behavioral and fMRI measurements described  
574 above, representational structure within each DNN layer (Figure 10A) was reproducible across  
575 image sets, increasing gradually from lower to higher layers (Image Set 1 versus Image Set 2, all  
576  $\rho = [0.21, 0.62]$ , all  $p < 0.0001$ ). For comparisons with representational structure in the behavioral  
577 judgments and fMRI, responses we averaged the RDMs across the two image sets separately for  
578 each layer. We then compared the representational structure of each layer with the RDMs for  
579 behavioral judgments and a number of fMRI ROIs (Figure 10B).

580 For behavior, we observed a consistent correlation with the DNN that gradually increased  
581 with higher layers, culminating in the highest correlation for layer 8 ( $\rho = 0.56$ , CI = [0.46, 0.69],  $p$   
582  $< 0.0001$ ). In contrast, the highest correlation with PPA was found for layer 5 ( $\rho = 0.55$ , CI = [0.44,  
583 0.68],  $p < 0.0001$ ); while its correlation also gradually increased from layer 1 to 5, higher layers did  
584 not differ significantly from layer 5. A similar pattern of results was observed for the larger vTC ROI  
585 (highest correlation with layer 5:  $\rho = 0.44$ , CI = [0.32, 0.60],  $p < 0.0001$ ). In contrast, none of the



586 DNN layers exhibited a significant correlation with FFA, whose correlations instead appeared to  
587 trend negatively (all  $\rho = [-0.18, -0.01]$ , all  $p > 0.05$ ), similar to the relationship between FFA and  
588 behavior.

589         These results demonstrate that higher-level DNN representations are reproducible across  
590 image sets and, surprisingly, are correlated with *both* the behavioral and the brain measurements  
591 in PPA and vTC, with relatively high maximal correlations for both domains (around  $\rho = 0.55$ ).  
592 However, behavioral and fMRI representational similarity differed in terms of which layer correlated  
593 more strongly. For behavioral judgments, higher layers invariably resulted in increasing  
594 correspondences with behavior, all the way to the top-most layer that is closest to the output (layer  
595 8). In contrast, correlations with fMRI measurements in high-level cortex regions increased up to  
596 mid-level layer 5, only to plateau or even decrease again for subsequent layers.

597         This result suggests that additional computations carried out in the fully-connected layers  
598 (6-8) are important to explain human behavioral judgments, but not fMRI responses, which map  
599 more strongly onto representations contained in the mid-to-high-level convolutional layers.

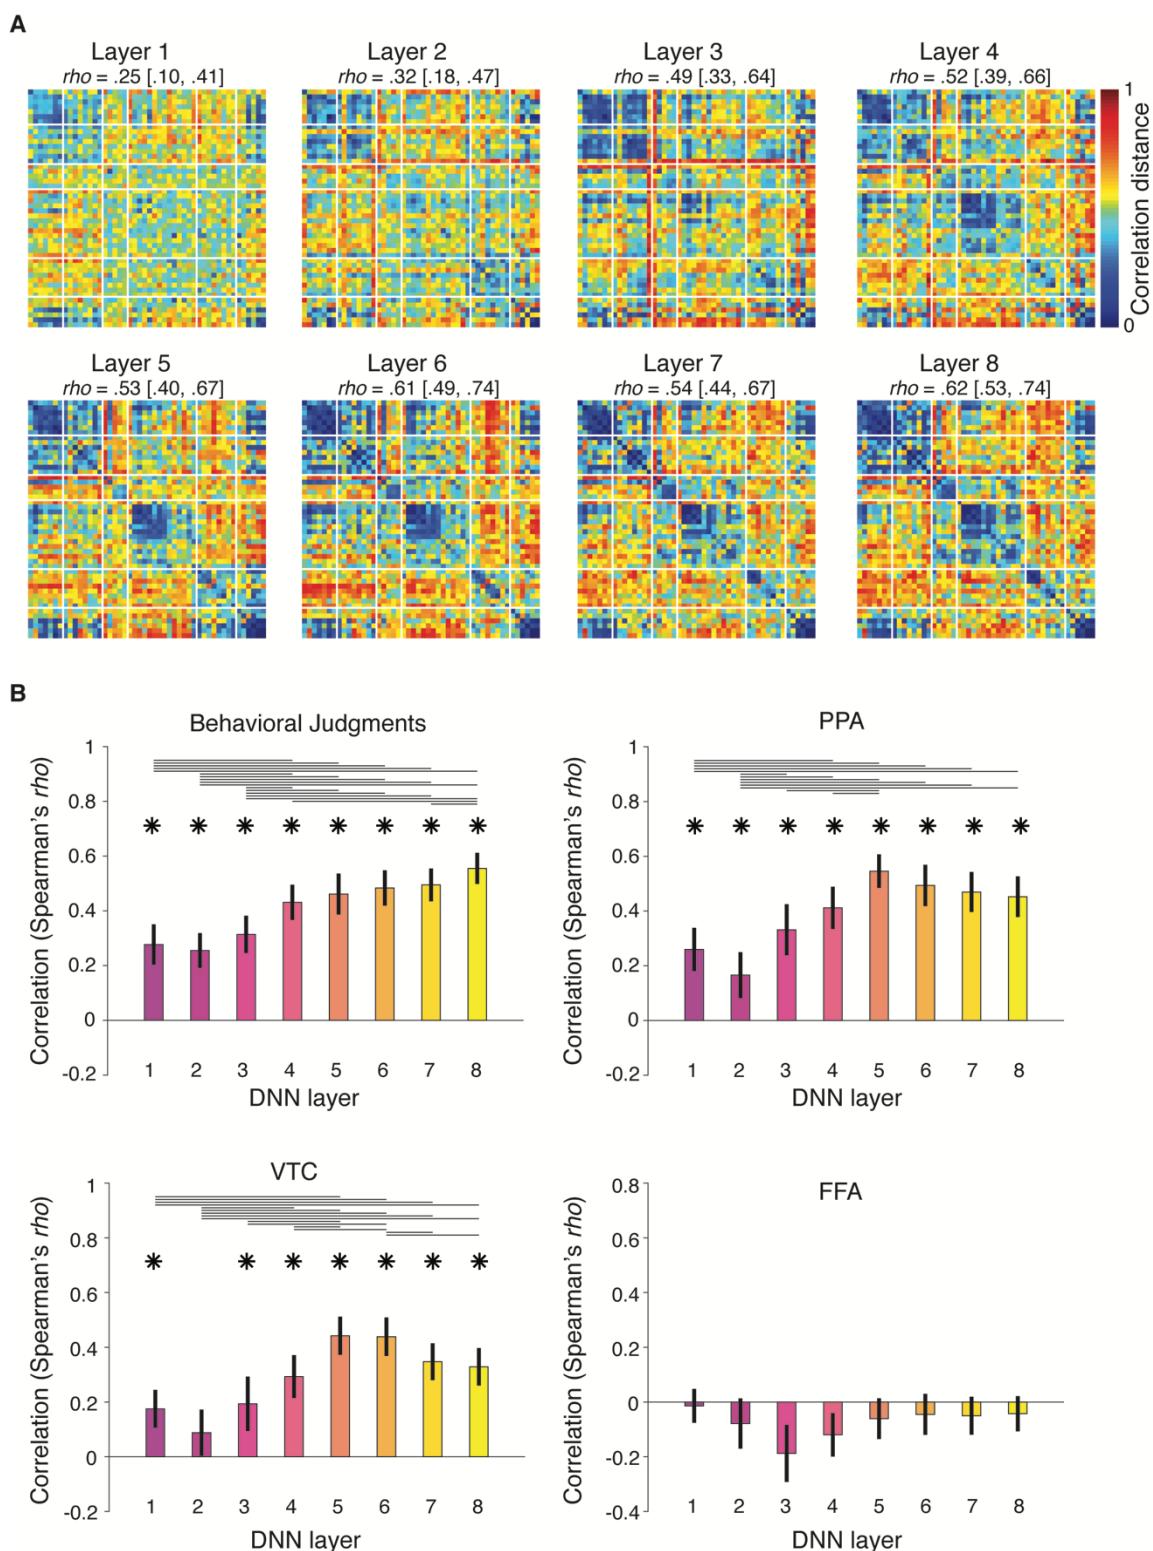

600

601 **Figure 10: DNN representations correlate with brain and behavior.** A) RDMs (correlation distances) for each of the 8  
 602 layers of the DNN, ordered based on the hierarchical clustering of the behavioral RDM. Superimposed white lines indicate  
 603 the cluster derived from the behavioral judgments RDM (see Figure 5A). The between set correlation values above each

604 RDM (*rho* [95% CI]) increase with layer number, reflecting increased reproducibility of representational structure for higher  
605 DNN layers. **B)** Correlation of each individual layers with behavior, vTC, PPA and FFA. \* significant correlations (FDR-  
606 corrected) relative to zero (two-tailed) as assessed with a randomization test ( $n = 10.000$ ). Horizontal lines indicate  
607 significant differences (FDR-corrected) between correlations (two-tailed) as assessed with bootstrapping ( $n = 10.000$ ). Error  
608 bars reflect the standard deviation of the mean correlation, obtained via a bootstrapping procedure (see Methods).

609

## 610 **Discussion**

611

612 We compared the representational similarity of behavioral judgments with those derived from fMRI  
613 measurements of visual cortex for a set of naturalistic images drawn from a range of object and  
614 scene categories. While the representational structure for each type of measurement was  
615 reproducible across image sets and participants, there was surprisingly limited agreement between  
616 the behavioral and fMRI results. While the behavioral data revealed a broad distinction between  
617 manmade (including humans) and natural (including animals) content, with clear sub-groupings of  
618 categories sharing conceptual properties (e.g., transportation: roads, signs, airplanes, bikes), the  
619 fMRI data largely reflected a division between images containing faces and bodies (e.g. kids,  
620 adults, older adults, body parts) and other types of categories, with sub-groupings that were very  
621 heterogeneous. This discrepancy was not due to the specific cortical regions chosen, and even the  
622 region showing the strongest correlation with behavior (scene-selective PPA) exhibited quite  
623 distinct representational structure from that observed for behavioral judgments. An off-the-shelf  
624 DNN appeared to explain both the behavioral and fMRI data, yet the behavior and fMRI data  
625 showed maximal correspondences with different layers, with fMRI responses mapping more  
626 strongly onto middle levels of representation compared to behavior. Collectively, these results  
627 demonstrate that there is not a simple mapping between multi-voxel responses in visual cortex and  
628 behavioral similarity judgments. Below, we discuss three potential explanations for this divergence.

629

630 *1) Visual versus conceptual information*

631

632 One possibility is that while the fMRI data reflect the visual properties of the stimuli, behavioral  
633 similarity judgments reflect conceptual structure that goes beyond those visual properties. Such a  
634 view is consistent with prior studies demonstrating that low-level visual properties contribute to  
635 responses in high-level regions of visual cortex (Watson et al., 2017; Groen et al., 2017). Our  
636 comparison with the DNN representations seem to support this suggestion, with fMRI most related  
637 to layer 5 and behavior corresponding most strongly to layer 8, consistent with prior studies  
638 reporting a peak correlation between scene-selective cortex and layer 5 in similar networks (Bonner  
639 and Epstein, 2017; Groen et al., 2018; but see Khaligh-Razavi and Kriegeskorte, 2014). The type  
640 of DNN layer may be an important factor as layers 1-5 are convolutional and contain 'features' that  
641 can be visualized (Zeiler and Fergus, 2014) and are still spatially localized in the image. In contrast,  
642 layers 6-8 perform a mapping of those features onto the class labels used in training. Thus the later  
643 DNN layers contain a potentially more fine-grained categorical representation that better matches  
644 behavior of human observers, while the fMRI responses correspond to an earlier stage of  
645 processing where visual features relevant for categorization are represented at a coarser level.

646 Others have suggested, however, that hierarchical visual models (e.g. HMax, DNN) do not  
647 capture semantic or conceptual information and that an additional level of representation is required  
648 (Clarke and Tyler, 2014; Clarke et al., 2015; Devereux et al., 2018). However, this view tends to  
649 discount the covariance between visual features and conceptual properties as well as co-  
650 occurrence statistics (e.g. a banana and an orange are much more likely to occur in an image  
651 together than a banana and a motorcycle). Indeed, the correspondence we observed between the  
652 higher levels of the DNN and behavioral similarity judgments, which appear to reflect fine-grained  
653 groupings of conceptually-related stimuli, suggests that a significant amount of conceptual  
654 information can be captured by a feedforward visual model.

655 While we focused on visual cortex, it has been reported that conceptual representations  
656 are reflected beyond visual cortex in perirhinal cortex (Devereux et al., 2018; Martin et al., 2018).  
657 However, our searchlight analysis demonstrated the strongest correlations between fMRI and  
658 behavioral similarity measures in scene-selective regions and did not highlight perirhinal cortex.

659 Our slices included occipital, temporal and parietal cortices but not prefrontal cortex, so it is possible  
660 that a stronger correspondence between the fMRI and behavior could emerge there.

661

## 662 2) *Organization of representations in the cortex*

663

664 In this study we compared behavioral similarity judgments with representations in regionally-  
665 localized brain regions using multi-voxel patterns. In this context, there are two important factors to  
666 consider, namely i) the scale and ii) the distribution of information representation in the cortex.

667 First, multi-voxel patterns may primarily reflect the large-scale topography of cortex rather  
668 than more fine-grained representations (Freeman et al., 2011). In high-level visual cortex, there are  
669 large-scale differences across the vTC reflecting the categorical distinction between faces and  
670 scenes that overlap with an eccentricity gradient (Hasson et al., 2002) and variation according to  
671 the real-world size of objects (Konkle and Oliva, 2012). These considerations are consistent with  
672 the general grouping we observed in the fMRI data that seemed to reflect a separation of images  
673 with faces and bodies from all other images. An alternative approach to using multi-voxel patterns  
674 is to model feature-selectivity at the individual voxel level (Naselaris et al., 2011). While this  
675 approach might be more sensitive to more fine-grained selectivity, it is striking that studies using  
676 this approach have primarily revealed smooth gradients across visual cortex that largely seem to  
677 reflect the large-scale category-selective organization (Huth et al., 2012; Wen et al., 2018) with  
678 evidence for a limited number of functional sub-domains (Çukur et al., 2013, 2016).

679 Second, the behavioral similarity judgments revealed apparent conceptual groupings that  
680 likely reflect multiple dimensions on which the images could be evaluated. A strong correspondence  
681 between a localized cortical region and the behavioral similarity judgments would suggest that all  
682 those dimensions are represented in a single region (i.e. a 'semantic hub'; Patterson et al., 2007).  
683 However, we found no such region in our searchlight analysis, suggesting that if it does exist, it  
684 likely lies outside of visual cortex. Alternatively, conceptual knowledge may be distributed across  
685 multiple regions with each representing specific object properties (Martin, 2016) and there is some  
686 fMRI evidence for distributed semantic representations (Huth et al., 2012). However, we also failed

687 to observe a good correspondence with behavior in our vTC ROI, which include a large proportion  
688 of high-level visual cortex. While it is possible that some differential weighting of the response  
689 across this region may have led to a better fit with the behavioral response, this possibility only  
690 further highlights the difficulty in mapping between the response of high-level visual cortex and  
691 behavior.

692

### 693 *3) Task differences*

694

695 The behavioral task required participants to compare simultaneously presented stimuli and make  
696 explicit similarity judgments, but an unrelated fixation cross task was performed during fMRI. It is  
697 thus possible that during fMRI participants processed the images differently, resulting in a different  
698 representational space (Mur et al., 2013) and a more explicit and involved fMRI task might have  
699 yielded more similar representations across tasks. However, while task has been reported to have  
700 a strong impact on behavioral representations (Schyns and Oliva, 1999; Harel and Bentin, 2009;  
701 Bracci et al., 2017a), fMRI studies have found limited effects of task on representations in vTC  
702 (Harel et al., 2014; Bracci et al., 2017a; Groen et al., 2018; Hebart et al., 2018). Instead, task effects  
703 appear to be much more prevalent in parietal and frontal regions (Erez and Duncan, 2015; Bracci  
704 et al., 2017a; Vaziri-Pashkam and Xu, 2017). In fact, the relative inflexibility of representations in  
705 vTC compared to behavior further highlights the difficulty in directly mapping between them.

706

### 707 *Representation of animacy*

708

709 One striking aspect of our results is that contrary to previous work (Kriegeskorte et al., 2008;  
710 Naselaris et al., 2012; Mur et al., 2013; Sha et al., 2015) we did not observe a clear separation of  
711 animate vs. inanimate categories in either behavioral or fMRI representational similarities. Instead,  
712 in behavior, images were initially grouped according to a broad division between man-made  
713 (including humans) and natural categories (including animals). With fMRI, we observed a  
714 separation of face and body categories from all others. This difference with the prior literature could

715 reflect a broader sampling of categories in our study or the use of backgrounds rather than  
716 segmented objects presented in isolation (Kriegeskorte et al., 2008; Sha et al., 2015). However,  
717 evidence for an animate distinction has been reported even with a large sampling of natural scenes  
718 (Naselaris et al., 2012). Alternatively, it is also possible that what has been termed animacy in  
719 previous studies primarily reflects the presence of face or body features and not animacy *per se*.  
720 Indeed, a recent study found that animate objects (e.g. cow) and inanimate objects that looked like  
721 an animate object (e.g. cow-shaped mug) are represented similarly in vTC (Bracci et al., 2017b).

722

### 723 *Conclusion*

724

725 By comparing behavioral similarity judgments with fMRI responses in visual cortex across a range  
726 of object and scene categories, we find that while there is a correlation between fMRI and behavior,  
727 particularly in scene-selective areas, the structure of representations is strikingly different. Further,  
728 while both the behavior and the fMRI data correlate well with DNN features, the modalities best  
729 matched different levels of representation. Collectively, these results suggest that there is not a  
730 simple mapping between localized fMRI responses and behavioral similarity judgments with each  
731 domain capturing different visual properties of the images.

732

733



734 **Bibliography**

735

- 736 Bau D, Zhou B, Khosla A, Oliva A, Torralba A (2017) Network dissection: Quantifying  
737 interpretability of deep visual representations. *Computer Vision and Pattern Recognition*  
738 (CVPR), 2017 IEEE Conference on:3319.
- 739 Bonner MF, Epstein RA (2017) Computational mechanisms underlying cortical responses to the  
740 affordance properties of visual scenes. *BioRxiv*.
- 741 Bracci S, Daniels N, Op de Beeck H (2017a) Task Context Overrides Object- and Category-  
742 Related Representational Content in the Human Parietal Cortex. *Cereb Cortex* 27:310–  
743 321.
- 744 Bracci S, Kalfas I, Op de Beeck H (2017b) The ventral visual pathway represents animal  
745 appearance over animacy, unlike human behavior and deep neural networks. *BioRxiv*.
- 746 Chatfield K, Simonyan K, Vedaldi A, Zisserman A (2014) Return of the Devil in the Details:  
747 Delving Deep into Convolutional Nets. *arXiv*.
- 748 Cichy RM, Khosla A, Pantazis D, Torralba A, Oliva A (2016) Comparison of deep neural networks  
749 to spatio-temporal cortical dynamics of human visual object recognition reveals  
750 hierarchical correspondence. *Sci Rep* 6:27755.
- 751 Clarke A, Devereux BJ, Randall B, Tyler LK (2015) Predicting the Time Course of Individual  
752 Objects with MEG. *Cereb Cortex* 25:3602–3612.
- 753 Clarke A, Tyler LK (2014) Object-specific semantic coding in human perirhinal cortex. *J Neurosci*  
754 34:4766–4775.
- 755 Connolly AC, Guntupalli JS, Gors J, Hanke M, Halchenko YO, Wu Y-C, Abdi H, Haxby JV (2012)  
756 The representation of biological classes in the human brain. *J Neurosci* 32:2608–2618.
- 757 Çukur T, Huth AG, Nishimoto S, Gallant JL (2013) Functional subdomains within human FFA. *J*  
758 *Neurosci* 33:16748–16766.
- 759 Çukur T, Huth AG, Nishimoto S, Gallant JL (2016) Functional Subdomains within Scene-Selective  
760 Cortex: Parahippocampal Place Area, Retrosplenial Complex, and Occipital Place Area.  
761 *J Neurosci* 36:10257–10273.
- 762 Devereux BJ, Clarke AD, Tyler LK (2018) Integrated deep visual and semantic attractor neural  
763 networks predict fMRI pattern-information along the ventral object processing pathway.  
764 *BioRxiv*.
- 765 Epstein RA (2008) Parahippocampal and retrosplenial contributions to human spatial navigation.  
766 *Trends Cogn Sci (Regul Ed)* 12:388–396.
- 767 Erez Y, Duncan J (2015) Discrimination of visual categories based on behavioral relevance in  
768 widespread regions of frontoparietal cortex. *J Neurosci* 35:12383–12393.
- 769 Freeman J, Brouwer GJ, Heeger DJ, Merriam EP (2011) Orientation decoding depends on maps,  
770 not columns. *J Neurosci* 31:4792–4804.
- 771 Greene MR, Baldassano C, Esteva A, Beck DM, Fei-Fei L (2016) Visual scenes are categorized  
772 by function. *J Exp Psychol Gen* 145:82–94.
- 773 Grill-Spector K, Weiner KS (2014) The functional architecture of the ventral temporal cortex and  
774 its role in categorization. *Nat Rev Neurosci* 15:536–548.
- 775 Groen II, Greene MR, Baldassano C, Fei-Fei L, Beck DM, Baker CI (2018) Distinct contributions  
776 of functional and deep neural network features to representational similarity of scenes in  
777 human brain and behavior. *Elife* 7.
- 778 Groen II, Silson EH, Baker CI (2017) Contributions of low- and high-level properties to neural  
779 processing of visual scenes in the human brain. *Phil Trans R Soc B* 372.
- 780 Güçlü U, van Gerven MAJ (2015) Deep Neural Networks Reveal a Gradient in the Complexity of  
781 Neural Representations across the Ventral Stream. *J Neurosci* 35:10005–10014.
- 782 Harel A, Bentin S (2009) Stimulus type, level of categorization, and spatial-frequencies utilization:  
783 implications for perceptual categorization hierarchies. *J Exp Psychol Hum Percept*  
784 *Perform* 35:1264–1273.
- 785 Harel A, Kravitz DJ, Baker CI (2014) Task context impacts visual object processing differentially  
786 across the cortex. *Proc Natl Acad Sci USA* 111:E962-71.
- 787 Hasson U, Harel M, Levy I, Malach R (2003) Large-scale mirror-symmetry organization of human  
788 occipito-temporal object areas. *Neuron* 37:1027–1041.



- 789 Hasson U, Levy I, Behrmann M, Hendler T, Malach R (2002) Eccentricity bias as an organizing  
790 principle for human high-order object areas. *Neuron* 34:479–490.
- 791 Hebart MN, Bankson BB, Harel A, Baker CI, Cichy RM (2018) The representational dynamics of  
792 task and object processing in humans. *Elife* 7.
- 793 Huth AG, Nishimoto S, Vu AT, Gallant JL (2012) A continuous semantic space describes the  
794 representation of thousands of object and action categories across the human brain.  
795 *Neuron* 76:1210–1224.
- 796 Jordan MC, Greene MR, Beck DM, Fei-Fei L (2015) Basic level category structure emerges  
797 gradually across human ventral visual cortex. *J Cogn Neurosci* 27:1427–1446.
- 798 Jordan MC, Greene MR, Beck DM, Fei-Fei L (2016) Typicality sharpens category representations  
799 in object-selective cortex. *Neuroimage* 134:170–179.
- 800 Kanwisher N (2010) Functional specificity in the human brain: a window into the functional  
801 architecture of the mind. *Proc Natl Acad Sci USA* 107:11163–11170.
- 802 Kanwisher N, Dilks DD (2013) The functional organization of the ventral visual pathway in  
803 humans. *The new visual neurosciences*:733–748.
- 804 Khaligh-Razavi S-M, Kriegeskorte N (2014) Deep supervised, but not unsupervised, models may  
805 explain IT cortical representation. *PLoS Comput Biol* 10:e1003915.
- 806 Konkle T, Oliva A (2012) A real-world size organization of object responses in occipitotemporal  
807 cortex. *Neuron* 74:1114–1124.
- 808 Kravitz DJ, Kriegeskorte N, Baker CI (2010) High-level visual object representations are  
809 constrained by position. *Cereb Cortex* 20:2916–2925.
- 810 Kravitz DJ, Peng CS, Baker CI (2011) Real-world scene representations in high-level visual  
811 cortex: it's the spaces more than the places. *J Neurosci* 31:7322–7333.
- 812 Kravitz DJ, Saleem KS, Baker CI, Ungerleider LG, Mishkin M (2013) The ventral visual pathway:  
813 an expanded neural framework for the processing of object quality. *Trends Cogn Sci*  
814 (Regul Ed) 17:26–49.
- 815 Kriegeskorte N (2015) Deep neural networks: A new framework for modeling biological vision and  
816 brain information processing. *Annu Rev Vis Sci* 1:417–446.
- 817 Kriegeskorte N, Mur M (2012) Inverse MDS: Inferring Dissimilarity Structure from Multiple Item  
818 Arrangements. *Front Psychol* 3:245.
- 819 Kriegeskorte N, Mur M, Ruff DA, Kiani R, Bodurka J, Esteky H, Tanaka K, Bandettini PA (2008)  
820 Matching categorical object representations in inferior temporal cortex of man and  
821 monkey. *Neuron* 60:1126–1141.
- 822 Krizhevsky A, Sutskever I, Hinton GE (2012) Imagenet classification with deep convolutional  
823 neural networks. *Adv Neural Inf Process Syst*:1097.
- 824 Larsson J, Heeger DJ (2006) Two retinotopic visual areas in human lateral occipital cortex. *J*  
825 *Neurosci* 26:13128–13142.
- 826 Malcolm GL, Groen IIA, Baker CI (2016) Making Sense of Real-World Scenes. *Trends Cogn Sci*  
827 (Regul Ed) 20:843–856.
- 828 Martin A (2016) GRAPES-Grounding representations in action, perception, and emotion systems:  
829 How object properties and categories are represented in the human brain. *Psychon Bull*  
830 *Rev* 23:979–990.
- 831 Martin CB, Douglas D, Newsome RN, Man LL, Barense MD (2018) Integrative and distinctive  
832 coding of visual and conceptual object features in the ventral visual stream. *Elife* 7.
- 833 Martin Cichy R, Khosla A, Pantazis D, Oliva A (2017) Dynamics of scene representations in the  
834 human brain revealed by magnetoencephalography and deep neural networks.  
835 *Neuroimage* 153:346–358.
- 836 Mur M, Meys M, Bodurka J, Goebel R, Bandettini PA, Kriegeskorte N (2013) Human Object-  
837 Similarity Judgments Reflect and Transcend the Primate-IT Object Representation. *Front*  
838 *Psychol* 4:128.
- 839 Naselaris T, Kay KN, Nishimoto S, Gallant JL (2011) Encoding and decoding in fMRI.  
840 *Neuroimage* 56:400–410.
- 841 Naselaris T, Stansbury DE, Gallant JL (2012) Cortical representation of animate and inanimate  
842 objects in complex natural scenes. *J Physiol Paris* 106:239–249.
- 843 Nili H, Wingfield C, Walther A, Su L, Marslen-Wilson W, Kriegeskorte N (2014) A toolbox for  
844 representational similarity analysis. *PLoS Comput Biol* 10:e1003553.

- 845 Oosterhof NN, Connolly AC, Haxby JV (2016) CoSMoMVPA: Multi-Modal Multivariate Pattern  
846 Analysis of Neuroimaging Data in Matlab/GNU Octave. *Front Neuroinformatics* 10:27.
- 847 Patterson K, Nestor PJ, Rogers TT (2007) Where do you know what you know? The  
848 representation of semantic knowledge in the human brain. *Nat Rev Neurosci* 8:976–987.
- 849 Peelen MV, Downing PE (2017) Category selectivity in human visual cortex: Beyond visual object  
850 recognition. *Neuropsychologia* 105:177–183.
- 851 Proklova D, Kaiser D, Peelen MV (2016) Disentangling Representations of Object Shape and  
852 Object Category in Human Visual Cortex: The Animate-Inanimate Distinction. *J Cogn  
853 Neurosci* 28:680–692.
- 854 Scholte HS (2017) Fantastic DNimals and where to find them. *Neuroimage*.
- 855 Schyns PG, Oliva A (1999) Dr. Angry and Mr. Smile: when categorization flexibly modifies the  
856 perception of faces in rapid visual presentations. *Cognition* 69:243–265.
- 857 Sha L, Haxby JV, Abdi H, Guntupalli JS, Oosterhof NN, Halchenko YO, Connolly AC (2015) The  
858 animacy continuum in the human ventral vision pathway. *J Cogn Neurosci* 27:665–678.
- 859 Silson EH, Chan AW-Y, Reynolds RC, Kravitz DJ, Baker CI (2015) A Retinotopic Basis for the  
860 Division of High-Level Scene Processing between Lateral and Ventral Human  
861 Occipitotemporal Cortex. *J Neurosci* 35:11921–11935.
- 862 Silson EH, Groen IIA, Kravitz DJ, Baker CI (2016a) Evaluating the correspondence between face-  
863 , scene-, and object-selectivity and retinotopic organization within lateral occipitotemporal  
864 cortex. *J Vis* 16:14.
- 865 Silson EH, Steel AD, Baker CI (2016b) Scene-selectivity and retinotopy in medial parietal cortex.  
866 *Front Hum Neurosci*.
- 867 Smith SM, Nichols TE (2009) Threshold-free cluster enhancement: addressing problems of  
868 smoothing, threshold dependence and localisation in cluster inference. *Neuroimage*  
869 44:83–98.
- 870 Tripp B (2017) A deeper understanding of the brain. *Neuroimage*.
- 871 Van de Moortele P-F, Auerbach EJ, Olman C, Yacoub E, Uğurbil K, Moeller S (2009) T1  
872 weighted brain images at 7 Tesla unbiased for Proton Density, T2\* contrast and RF coil  
873 receive B1 sensitivity with simultaneous vessel visualization. *Neuroimage* 46:432–446.
- 874 Vaziri-Pashkam M, Xu Y (2017) Goal-Directed Visual Processing Differentially Impacts Human  
875 Ventral and Dorsal Visual Representations. *J Neurosci* 37:8767–8782.
- 876 Vedaldi A, Lenc K (2015) Matconvnet: convolutional neural networks for MATLAB. In:  
877 Proceedings of the 23rd ACM international conference on Multimedia - MM '15, pp 689–  
878 692. New York, New York, USA: ACM Press.
- 879 Watson DM, Andrews TJ, Hartley T (2017) A data driven approach to understanding the  
880 organization of high-level visual cortex. *Sci Rep* 7:3596.
- 881 Wen H, Shi J, Chen W, Liu Z (2018) Deep residual network predicts cortical representation and  
882 organization of visual features for rapid categorization. *Sci Rep* 8:3752.
- 883 Wen H, Shi J, Zhang Y, Lu K-H, Cao J, Liu Z (2017) Neural Encoding and Decoding with Deep  
884 Learning for Dynamic Natural Vision. *Cereb Cortex*:1–25.
- 885 Yamins DLK, DiCarlo JJ (2016) Using goal-driven deep learning models to understand sensory  
886 cortex. *Nat Neurosci* 19:356–365.
- 887 Yamins DLK, Hong H, Cadieu CF, Solomon EA, Seibert D, DiCarlo JJ (2014) Performance-  
888 optimized hierarchical models predict neural responses in higher visual cortex. *Proc Natl  
889 Acad Sci USA* 111:8619–8624.
- 890 Zeiler MD, Fergus R (2014) Visualizing and understanding convolutional networks. *European  
891 conference on computer vision*:818.
- 892 Zhou B, Lapedriza A, Xiao J, Torralba A, Oliva A (2014) Learning deep features for scene  
893 recognition using places database. *Adv Neural Inf Process Syst*:487.
- 894
